# Supplementary material for: Development and characterisation of a novel glucagon like peptide-1 receptor antibody
Source: Springer Nature journal article supplement (doi:10.1007/s00125-017-4491-0), 2017-11-08
Supplement: MOESM1 [file 15204620]

## **Electronic supplementary material (ESM)**

### **Methods**

#### **Receptor Ligand Binding Assay**

A mirrorball system (TTP Labtech, Melbourn, UK) was used for the receptor ligand binding assay [1]. All reagents were prepared in HBSS containing 25 mmol/l HEPES and 0.1% (w/v) BSA. Serial dilutions of AlexaFluor647 tagged GLP-1 (Cambridge Research Biochemicals, Billingham, UK) +/- 0.5 µmol/l Exendin-4 were incubated with GLP1R overexpressing CHO cell lines (1000 cells per well), overnight at 4°C in the dark. Plates were read using the FL3 (650-690 nm) emission channel on the mirrorball, FL3 total readings (median fluorescence per event x count) were plotted.

### **Tables**

**ESM Table 1: Antibody details used for immunostaining**

|             | Dilution       | Source               |
|-------------|----------------|----------------------|
| dsRed       | 1/1000 – 1/500 | Clontech, #632496    |
| Insulin     | 1/100          | Abcam, #7842         |
| Proglucagon | 1/100          | Santa Cruz, #sc-7782 |

**ESM Table 2: GLP-1 and Glp1R0017 activity in the GLP1R overexpressing CHO cell lines**

|                                    | Mouse<br>GLP1R | Human<br>GLP1R | Rat<br>GLP1R | Cyno<br>GLP1R | Dog<br>GLP1R |
|------------------------------------|----------------|----------------|--------------|---------------|--------------|
| Glp1R0017 IC <sub>50</sub> (mol/l) | 5.21E-09       | 4.33E-08       | 5.3E-09      | 8.99E-09      | 11.7E-09     |
| GLP-1 EC <sub>50</sub> (mol/l)     | 3.92E-12       | 1.45E-12       | 4.51E-12     | 7.05E-13      | 6.07E-12     |

Mean IC<sub>50</sub> values for Glp1R0017, and mean EC<sub>50</sub> values for GLP-1 are tabulated.

## Figures

ESM Fig 1: GLP-1 agonism in the GLP1R overexpressing CHO cell lines.

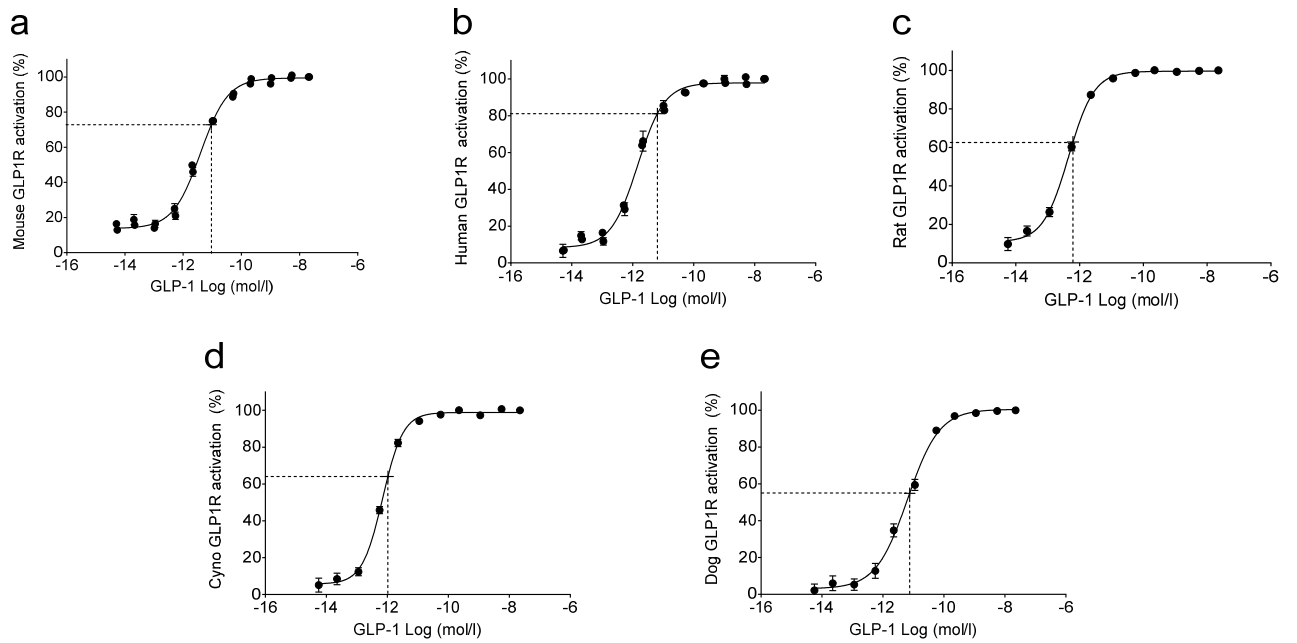

GLP-1 dose response curves for CHO cells overexpressing mouse GLP1R (A), human GLP1R (B), rat GLP1R (C), cyno GLP1R (D), and dog GLP1R (E) are displayed. The concentration of GLP-1 used as the agonist challenge in the antagonistic cAMP assays is marked on for each cell line.

ESM Fig 2: Binding of AlexaFluor647 tagged GLP-1 to the GLP1R overexpressing CHO cell lines.

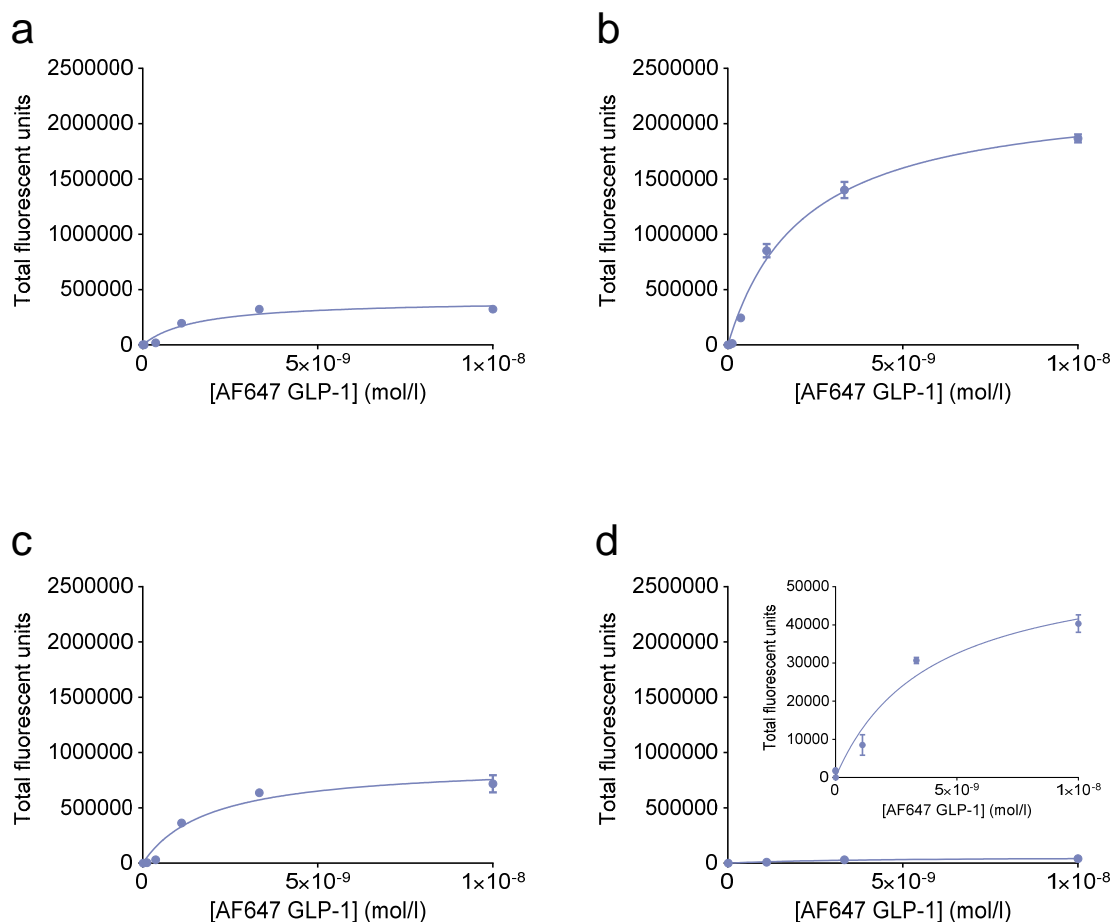

| Cell Line   | FL Max (RFU)              |        | K <sub>D</sub> (mol/l) |          |
|-------------|---------------------------|--------|------------------------|----------|
|             | Mean                      | SD     | Mean                   | SD       |
| Human GLP1R | 480000                    | 170000 | 1.57E-09               | 8.42E-10 |
| Rat GLP1R   | 1800000                   | 690000 | 2.21E-09               | 5.71E-10 |
| Cyno GLP1R  | 940000                    | 77000  | 1.48E-09               | 4.46E-10 |
| Mouse GLP1R | Below limits of detection |        |                        |          |
| Dog GLP1R   | 51000                     | 7500   | 2.11E-09               | 1.54E-09 |

Representative AlexaFluor647 GLP-1 binding curves (n=3) are displayed for CHO cells overexpressing human GLP1R (A), rat GLP1R (B), cyno GLP1R (C), and dog GLP1R with zoom inset (D). The mean fluorescent max (FL max) and K<sub>D</sub> for each cell line was calculated and tabulated (E). Non-linear binding curves were plotted using GraphPadPrism, with non-specific binding and background constrained to 0.

## **References**

1. England E, Newton P, Neal F, Kitching L, Colley C and Rossant CJ (2015) Application of the mirrorball high-sensitivity cytometer to multiplexed assays for antibody drug discovery. *J Biomol Screen* 20: 536-544.
